# Supplementary material for: Time and Age Trends in Free Sugar Intake from Food Groups among Children and Adolescents between 1985 and 2016
Source: PubMed Central journal article supplement (PMC7019792; doi:10.3390/nu12010020), 2019-12-20
Supplement: nutrients-12-00020-s001.pdf [file nutrients-12-00020-s001.pdf]

1 **Table S1:** Time and age trends in free sugar intake from different food groups of 10,761 dietary records of 1,312 DONALD study participants (n = 660 boys, n = 652 girls)  
 2 (3–18 years) between 1985 and 2016

|                                          | Age trend per year of age (3–18 years) <sup>a</sup> |                                 |                                 | Time trend per study year (1985–2016) <sup>b</sup> |                                  |                                  | Interaction of<br>time and age |
|------------------------------------------|-----------------------------------------------------|---------------------------------|---------------------------------|----------------------------------------------------|----------------------------------|----------------------------------|--------------------------------|
|                                          | Age<br>$\beta$ (p)                                  | Age <sup>2</sup><br>$\beta$ (p) | Age <sup>3</sup><br>$\beta$ (p) | Time<br>$\beta$ (p)                                | Time <sup>2</sup><br>$\beta$ (p) | Time <sup>3</sup><br>$\beta$ (p) | Age x Time<br>$\beta$ (p)      |
| <b>FS from sweet bread &amp; cakes</b>   |                                                     |                                 |                                 |                                                    |                                  |                                  |                                |
| Boys <sup>c</sup>                        |                                                     |                                 |                                 |                                                    |                                  |                                  |                                |
| Unadjusted model                         | 0.1573 (0.0252)                                     | -0.01782 (0.0180)               | 0.000460 (0.0586)               | -0.06815 (0.0136)                                  | 0.005533 (0.0038)                | -0.00010 (0.0087)                |                                |
| Adjusted model                           | 0.1517 (0.0305)                                     | -0.01680 (0.0254)               | 0.000430 (0.0767)               | -0.07273 (0.0084)                                  | 0.005750 (0.0026)                | -0.00011 (0.0061)                |                                |
| Girls <sup>d</sup>                       |                                                     |                                 |                                 |                                                    |                                  |                                  |                                |
| Unadjusted model                         | 0.2285 (0.0017)                                     | -0.02813 (0.0003)               | 0.000893 (0.0004)               | -0.07492 (0.0062)                                  | 0.006724 (0.0004)                | -0.00013 (0.0006)                |                                |
| Adjusted model                           | 0.2191 (0.0025)                                     | -0.02665 (0.0006)               | 0.000849 (0.0007)               | -0.07397 (0.0067)                                  | 0.006537 (0.0006)                | -0.00013 (0.0008)                |                                |
| <b>FS from RTC</b>                       |                                                     |                                 |                                 |                                                    |                                  |                                  |                                |
| Boys <sup>e</sup>                        |                                                     |                                 |                                 |                                                    |                                  |                                  |                                |
| Unadjusted model                         | 0.3022 (<0.0001)                                    | -0.02523 (0.0004)               | 0.000638 (0.0063)               | 0.1110 (<0.0001)                                   | -0.00495 (0.0045)                | 0.000063 (0.0792)                |                                |
| Adjusted model                           | 0.3116 (<0.0001)                                    | -0.02649 (0.0002)               | 0.000677 (0.0036)               | 0.1122 (<0.0001)                                   | -0.00495 (0.0045)                | 0.000063 (0.0780)                |                                |
| Girls <sup>f</sup>                       |                                                     |                                 |                                 |                                                    |                                  |                                  |                                |
| Unadjusted model                         | 0.2673 (<0.0001)                                    | -0.02361 (<0.0001)              | 0.000580 (0.0030)               | 0.04111 (<0.0001)                                  | -0.00127 (<0.0001)               |                                  | 0.001045 (0.0359)              |
| Adjusted model                           | 0.2796 (<0.0001)                                    | -0.02507 (<0.0001)              | 0.000626 (0.0013)               | 0.04267 (<0.0001)                                  | -0.00124 (<0.0001)               |                                  | 0.000917 (0.0661)              |
| <b>FS from other sources<sup>g</sup></b> |                                                     |                                 |                                 |                                                    |                                  |                                  |                                |
| Unadjusted model                         | 0.003417 (0.9072)                                   | -0.00280 (0.3713)               | 0.000138 (0.1773)               | -0.03480 (0.0012)                                  | 0.002869 (<0.0001)               | -0.00006 (<0.0001)               | 0.001437 (<0.0001)             |
| Adjusted model                           | -0.00328 (0.9111)                                   | -0.00229 (0.4644)               | 0.000123 (0.2296)               | -0.03272 (0.0025)                                  | 0.002711 (0.0003)                | -0.00006 (0.0002)                | 0.001512 (<0.0001)             |

3 Time and age trends were tested using polynomial mixed-effects regression models

4 FS=Free sugar

5 <sup>a</sup>Age=linear age trend, age<sup>2</sup>=quadratic age trend, age<sup>3</sup>=cubic age trend <sup>b</sup>time=linear time trend, time<sup>2</sup>=quadratic time trend, time<sup>3</sup>=cubic time trend

6 <sup>c</sup>Model contains a random statement for the family level with an unstructured covariance structure. Adjusted for number of weekdays per record (1/2/3).

7 <sup>d</sup>Model contains a random statement for the family level with factor analytic covariance structure and a random statement for the person level with an unstructured covariance  
 8 structure. Adjusted for number of weekdays per record (1/2/3).

9 <sup>e</sup>Model contains a repeated statement with a heterogeneous toeplitz covariance structure. Adjusted for number of weekdays per record (1/2/3).

- 10 <sup>¶</sup>Model contains a repeated statement with a factor analytic covariance structure. Adjusted for number of weekdays per record (1/2/3).
- 11 <sup>§</sup>Model contains a repeated statement with a factor analytic covariance structure. Adjusted for number of weekdays per record (1/2/3), high maternal educational status (yes/no),
- 12 overweight status (yes/no), maternal employment (yes/no).
- 13

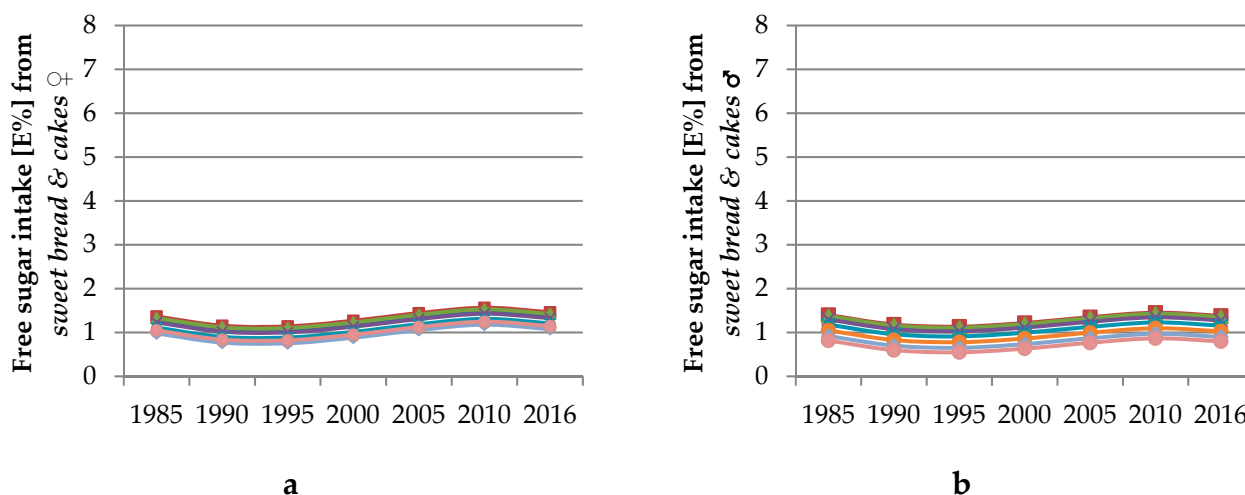

14 **Figure S1.** Time and age trends in FS intake from sweet bread & cakes among girls (a) and boys (b) of  
 15 10,761 dietary records of 660 male and 652 female DONALD study participants (3-18 years) between  
 16 1985 and 2016, predicted by polynomial mixed-effects regression models (see Table S1) (blue rhombi  
 17 3/4-year-olds, red squares 5/6-year-olds, green triangles 7/8-year-olds, purple crosses 9/10-year-olds,  
 18 turquoise stars 11/12-year-olds, orange circles 13/14-year-olds, light blue rhombi 15/16-year-olds,  
 19 pink circles 17/18-year-olds).

20

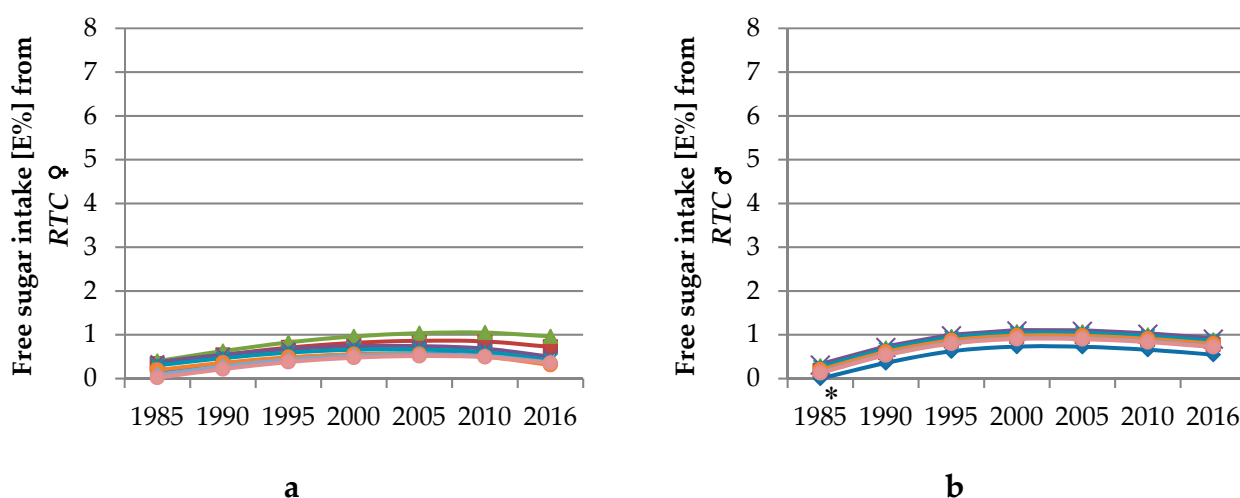

21 **Figure S2.** Time and age trends in FS intake from RTC among girls (a) and boys (b) of 10,761 dietary  
 22 records of 660 male and 652 female DONALD study participants (3-18 years) between 1985 and 2016,  
 23 predicted by polynomial mixed-effects regression models (see Table S1) (blue rhombi 3/4-year-olds,  
 24 red squares 5/6-year-olds, green triangles 7/8-year-olds, purple crosses 9/10-year-olds, turquoise  
 25 stars 11/12-year-olds, orange circles 13/14-year-olds, light blue rhombi 15/16-year-olds, pink circles  
 26 17/18-year-olds).

27 \* FS intake from RTC among 3/4 year olds in 1985 was set to 0, if the calculation of predicted  
 28 values from the regression equations reveals values <0.

29

30

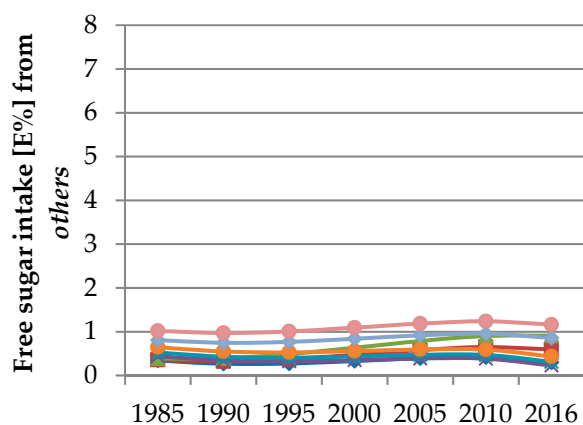

31 **Figure S3.** Time and age trends in FS intake from *others* of 10,761 dietary records of 1,312 DONALD  
32 study participants (3-18 years) between 1985 and 2016, predicted by polynomial mixed-effects  
33 regression models (see Table S1) (blue rhombi 3/4-year-olds, red squares 5/6-year-olds, green  
34 triangles 7/8-year-olds, purple crosses 9/10-year-olds, turquoise stars 11/12-year-olds, orange circles  
35 13/14-year-olds, light blue rhombi 15/16-year-olds, pink circles 17/18-year-olds).

36
